# Supplementary material for: Warming Amplified the Effect of Phosphorus addition on N<sub>2</sub>O Emissions in a Peatland
Source: Preprints.org preprint supplement (doi:10.20944/preprints202311.0075.v1), 2023-11-02
Supplement: Supplementary file 1 [file supplementary]

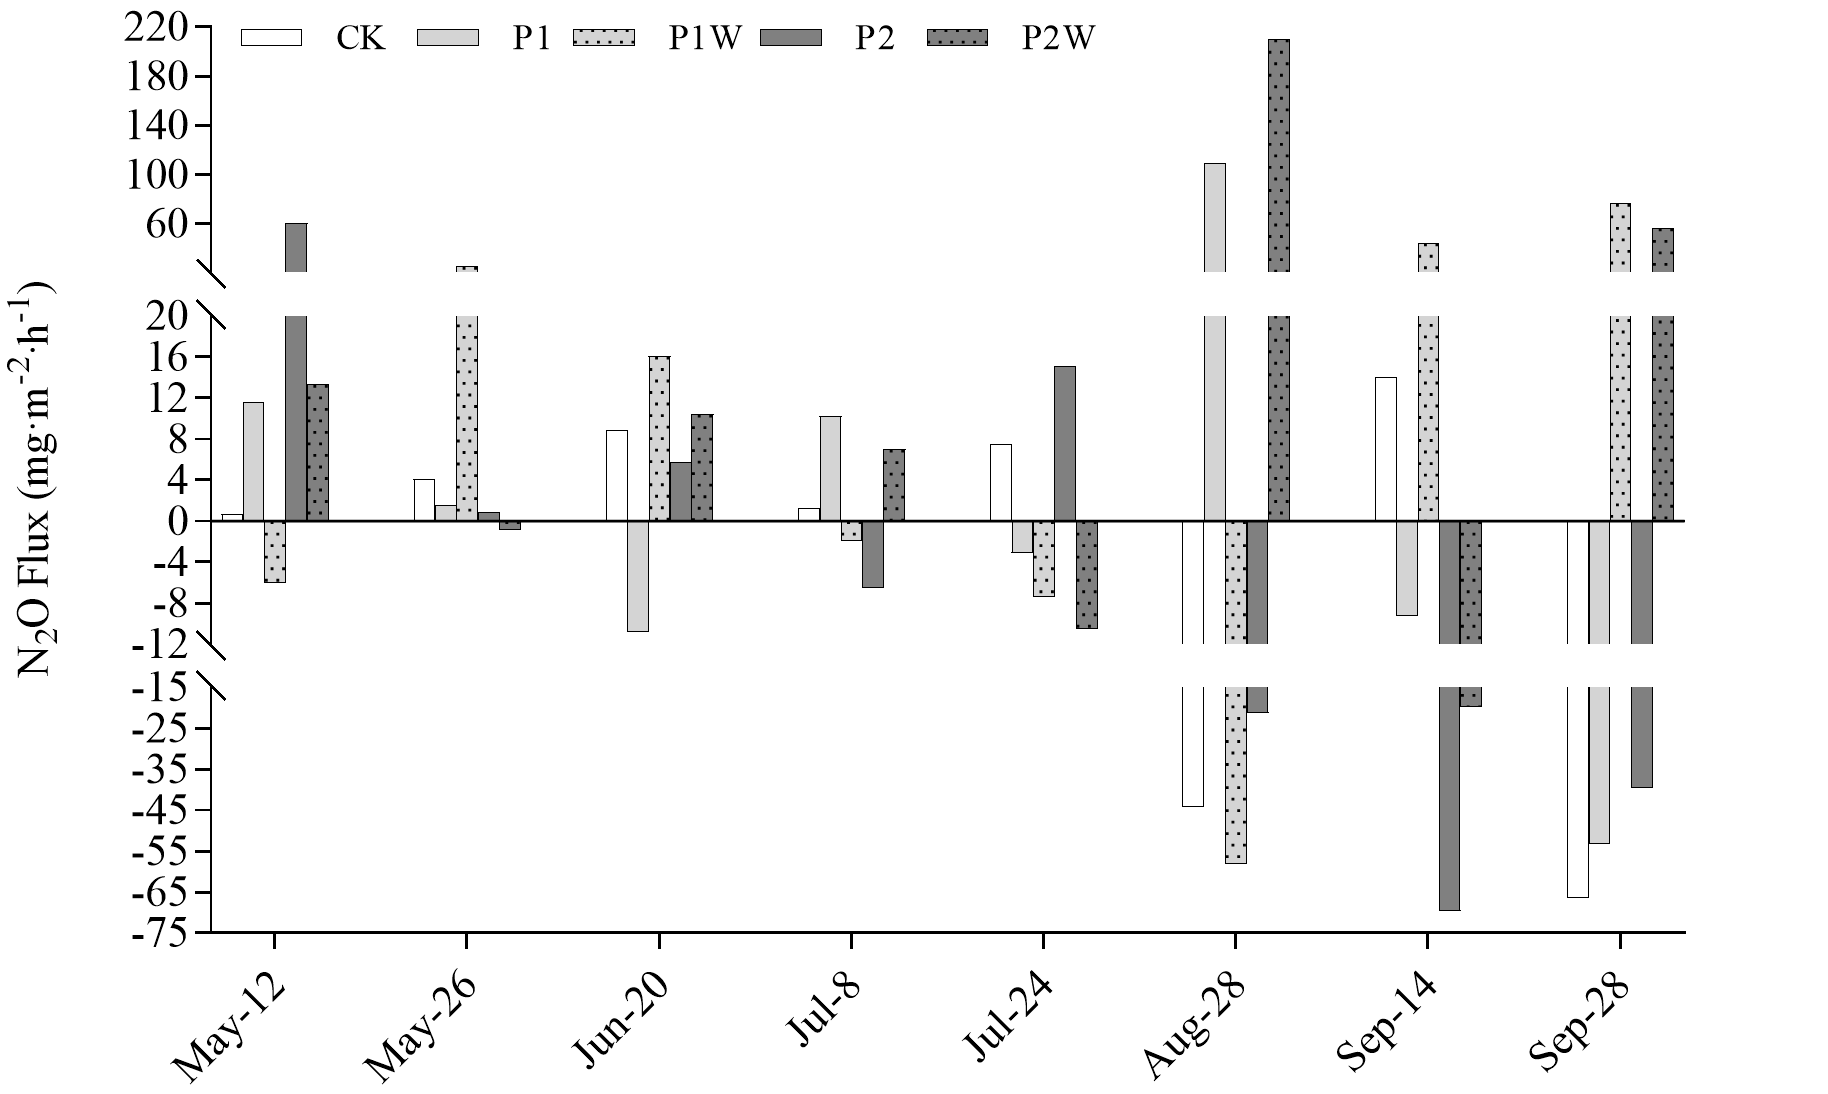


Figure S1 Monthly mean N2O fluxes (mean ± SEM, *n* = 4) in Hani peatland in the growing season of 2019. CK, control; P1, P addition with 5 kg P ha-1 yr-1; P2, P addition with 10 kg P ha-1 yr-1; P1W, P1 + warming; P2W, P2 + warming.


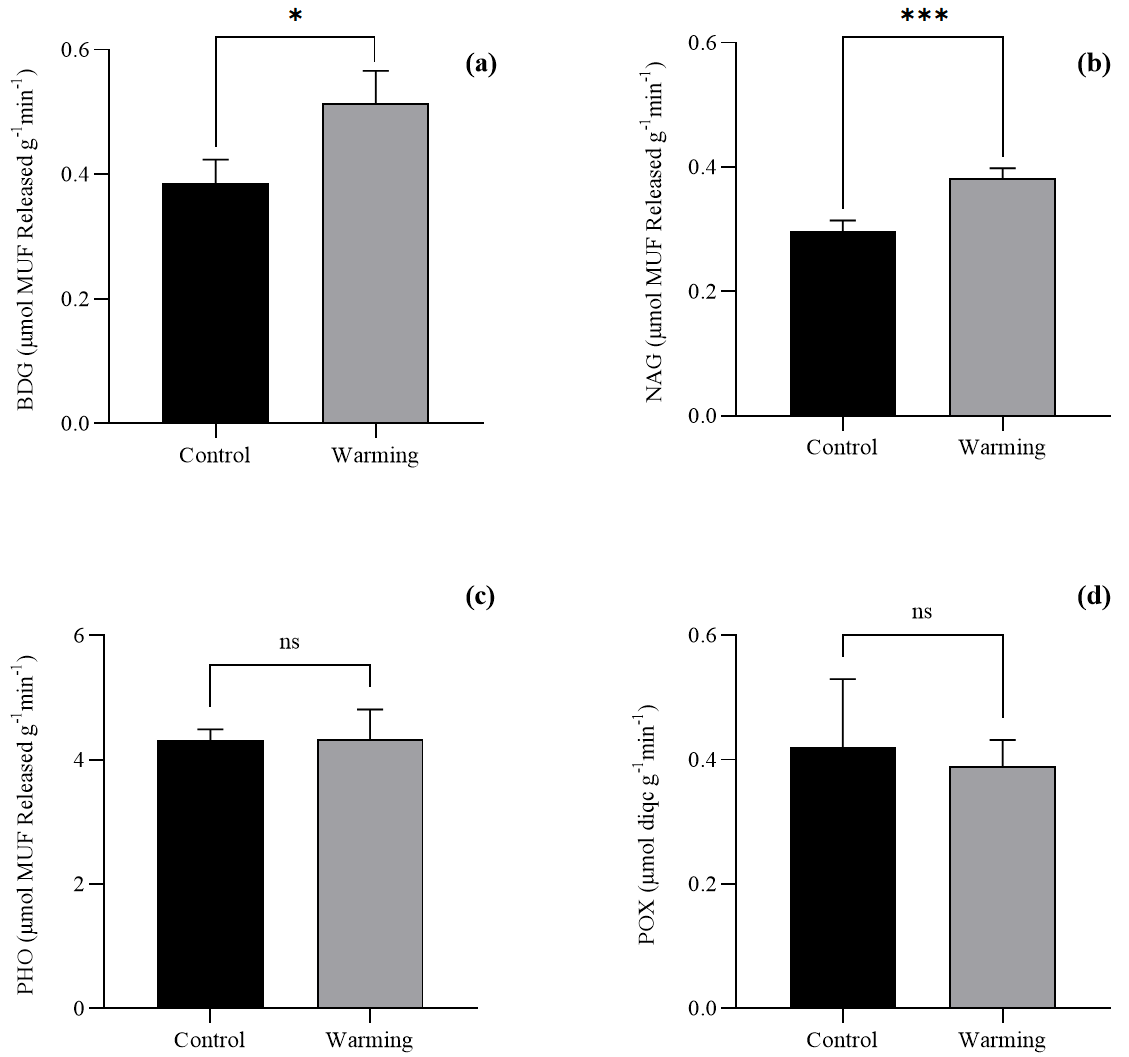


Figure S2 Soil enzyme activities under warming (mean ± SEM, *n* = 4), (a) BDG; (b) NAG; (c) PHO; (d) POX. BDG, β-D-glucosidase; NAG, N-acetyl-β-glucosaminidase; PHO, phosphatase; POX, phenol oxidase. Asterisk represents a significant difference, ********P* < 0.01; *******P* < 0.05; ******P* < 0.1; ns, no significant difference.

Table S1 Correlation analysis between biological and abiotic factors under P addition and co-effect of P addition and warming in Hani peatland.

|  | Flux | DOC | TP | TN | TC | SC | VPC | TCov | WTD | C:N | N:P | pH | BDG | NAG | POX | PHO |
| --- | --- | --- | --- | --- | --- | --- | --- | --- | --- | --- | --- | --- | --- | --- | --- | --- |
| Flux |  |  |  |  |  |  |  |  |  |  |  |  |  |  |  |  |
| DOC | 0.091 |  |  |  |  |  |  |  |  |  |  |  |  |  |  |  |
| TP | 0.362 | **0.562**** |  |  |  |  |  |  |  |  |  |  |  |  |  |  |
| TN | 0.201 | 0.246 | **0.768***** |  |  |  |  |  |  |  |  |  |  |  |  |  |
| TC | -0.045 | -0.254 | 0.146 | 0.269 |  |  |  |  |  |  |  |  |  |  |  |  |
| SC | -0.278 | -0.209 | -0.348 | -0.056 | 0.332 |  |  |  |  |  |  |  |  |  |  |  |
| VPC | 0.355 | **0.452**** | **0.544**** | 0.285 | -0.295 | **-0.606***** |  |  |  |  |  |  |  |  |  |  |
| TCov | -0.135 | -0.004 | **-0.475**** | -0.346 | -0.099 | **0.674***** | **-0.402*** |  |  |  |  |  |  |  |  |  |
| WTD | -0.242 | **-0.575***** | -0.235 | 0.088 | **0.476**** | 0.135 | **-0.467**** | -0.165 |  |  |  |  |  |  |  |  |
| C:N | -0.195 | -0.318 | **-0.766***** | **-0.975***** | -0.061 | 0.112 | -0.357 | 0.327 | 0.008 |  |  |  |  |  |  |  |
| N:P | -0.36 | **-0.639***** | **-0.927***** | **-0.529**** | 0.027 | **0.525**** | **-0.725***** | **0.489**** | **0.410*** | **0.556**** |  |  |  |  |  |  |
| pH | -0.047 | **-0.488**** | -0.37 | 0.077 | 0.078 | 0.142 | -0.072 | -0.2 | 0.299 | -0.082 | **0.435*** |  |  |  |  |  |
| BDG | **0.432*** | **0.411*** | **0.683***** | **0.549**** | -0.297 | **-0.529**** | **0.668***** | -0.348 | -0.317 | **-0.617***** | **-0.701***** | -0.229 |  |  |  |  |
| NAG | **0.515**** | **0.394*** | **0.693***** | **0.639***** | 0.093 | -0.185 | **0.416*** | -0.188 | -0.142 | **-0.641***** | **-0.618***** | 0.027 | **0.705***** |  |  |  |
| POX | 0.346 | **0.728***** | **0.722***** | **0.422*** | -0.264 | **-0.456**** | **0.638***** | -0.25 | **-0.589***** | **-0.495**** | **-0.778***** | -0.244 | **0.621***** | **0.491**** |  |  |
| PHO | -0.227 | **-0.504**** | **-0.476**** | -0.374 | 0.186 | **0.643***** | **-0.657***** | **0.459**** | 0.208 | **0.431*** | **0.586***** | -0.002 | **-0.624***** | **-0.551**** | **-0.509**** |  |

Note: WTD, water table depth; DOC, dissolved organic carbon; TN, total nitrogen; TC, total carbon; TP, total phosphorus; SC, *Sphagnum* cover; VPC, vascular plants cover; TCov, total cover; BDG, β-D-glucosidase; NAG, N-acetyl-β-glucosaminidase; POX, phenol oxidase; PHO, phosphatase. ********P* < 0.01, *******P* < 0.05, ******P* < 0.1.
